# Supplementary material for: Inhibition of Apoptosis in a Model of Ischemic Stroke Leads to Enhanced Cell Survival, Endogenous Neural Precursor Cell Activation and Improved Functional Outcomes
Source: MDPI journal article supplement (doi:10.3390/ijms25031786), 2024-02-01
Supplement: s1 [file s1]

Supplementary Table S1

**Table S1.** NWL283 is a selective covalent inhibitor of caspase-3/7. NWL283 has a half maximal inhibitory concentration (IC<sub>50</sub>) of 8 nM against caspase-3 and 21 nM against caspase-7, with minimal inhibition against other caspases.

| Caspase             | 1   | 2       | 3 | 4     | 5       | 6   | 7  | 8    | 9     | 10      |
|---------------------|-----|---------|---|-------|---------|-----|----|------|-------|---------|
| Enzymatic IC50 (nM) | 290 | > 10000 | 8 | 27000 | > 10000 | 535 | 21 | 2800 | 41000 | > 10000 |



Supplementary Figure S1

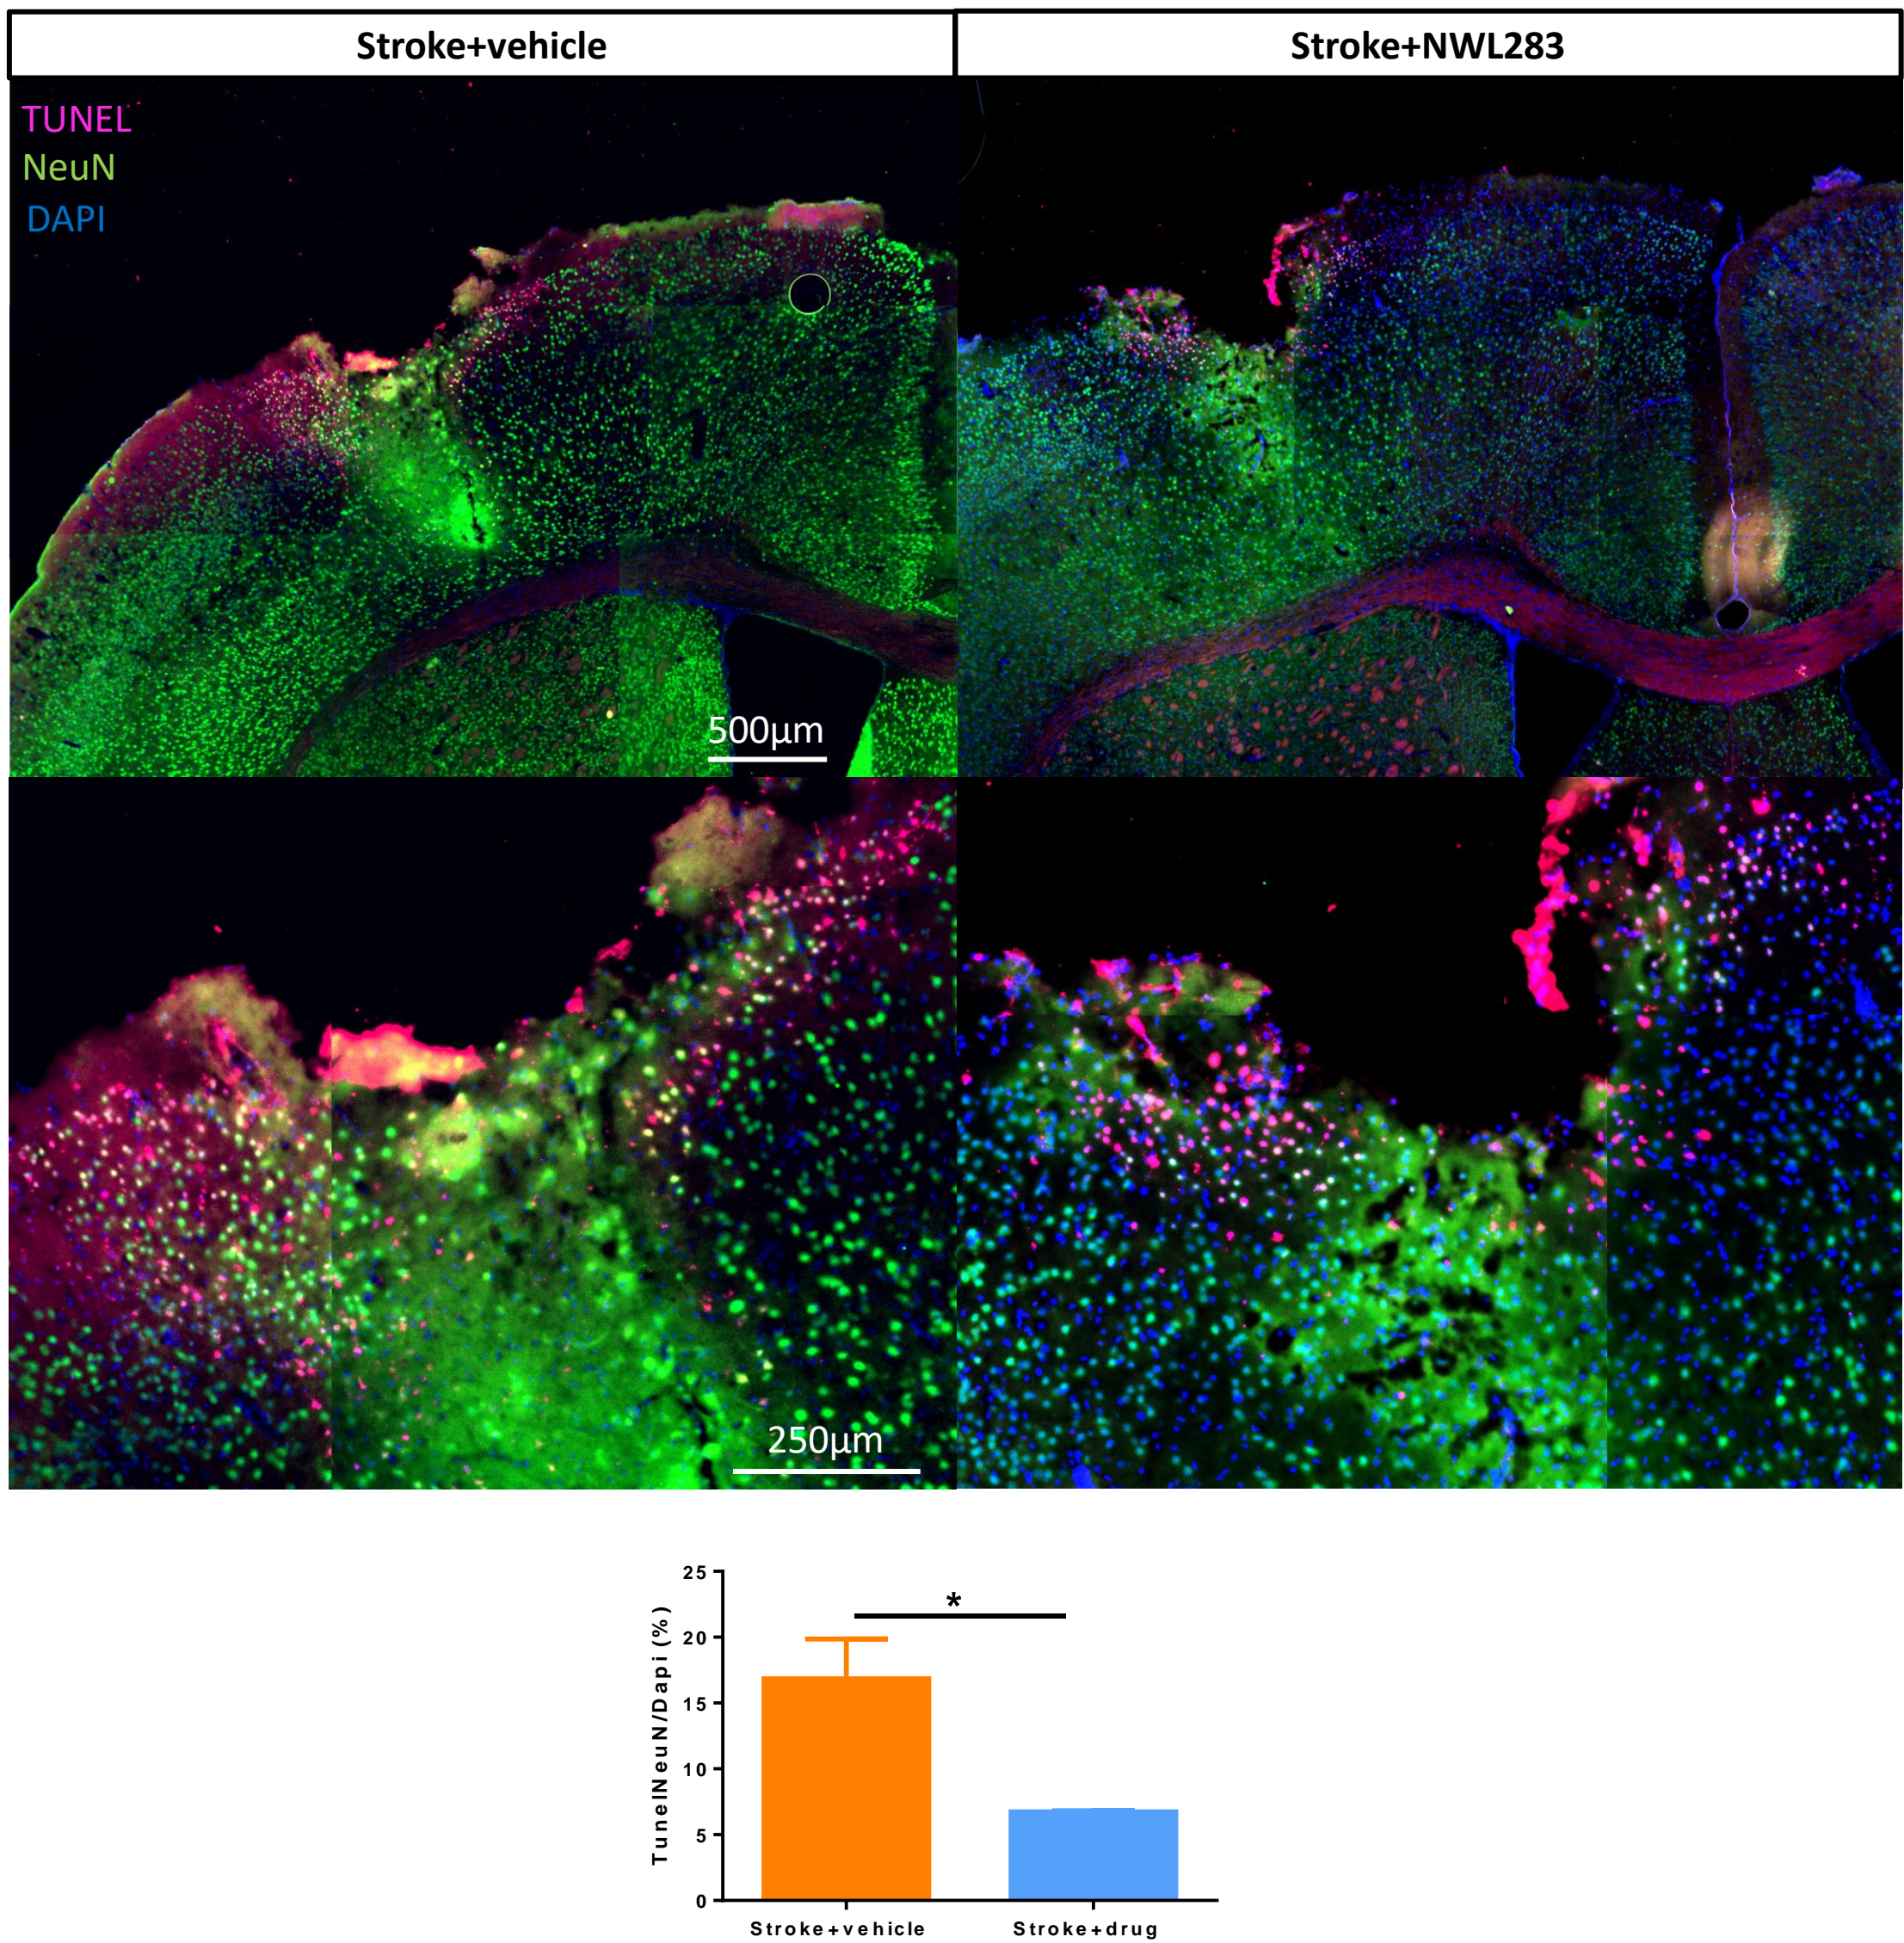

**Figure S1.** NWL283 administration leads to reduced TUNEL+NeuN+ cells.  $p=0.036$ , Student's T-test.  $*p<0.05$ , Student's T-test.  $n=3$  per group; mean+SEM.



Supplementary Figure S2

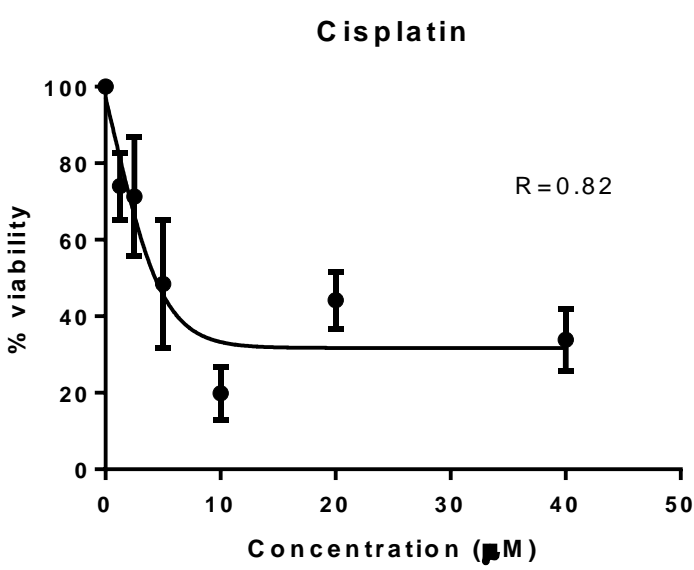

**Figure S2.** NPCs show a cisplatin dose dependent cell death, reaching a plateau at 20μM cisplatin concentration.  $n=3$ ; mean±SEM.

Supplementary Figure S3

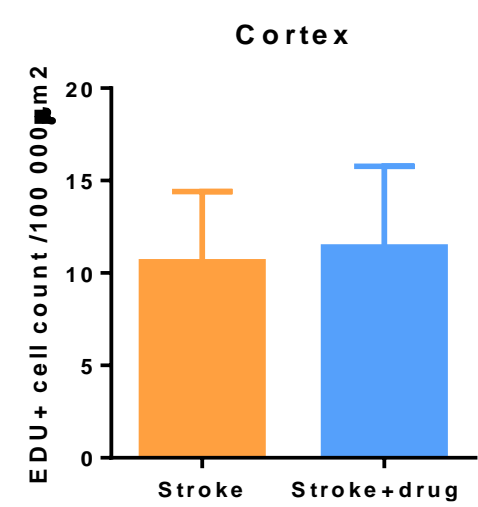

**Figure S3.** The number of EDU+ cells was not different within the cortex of stroke+vehicle and stroke+NWL283 mice.  $p=0.89$ , Student's T-test.  $n=3-4$ ; mean $\pm$ SEM.

## Supplementary Figure S4

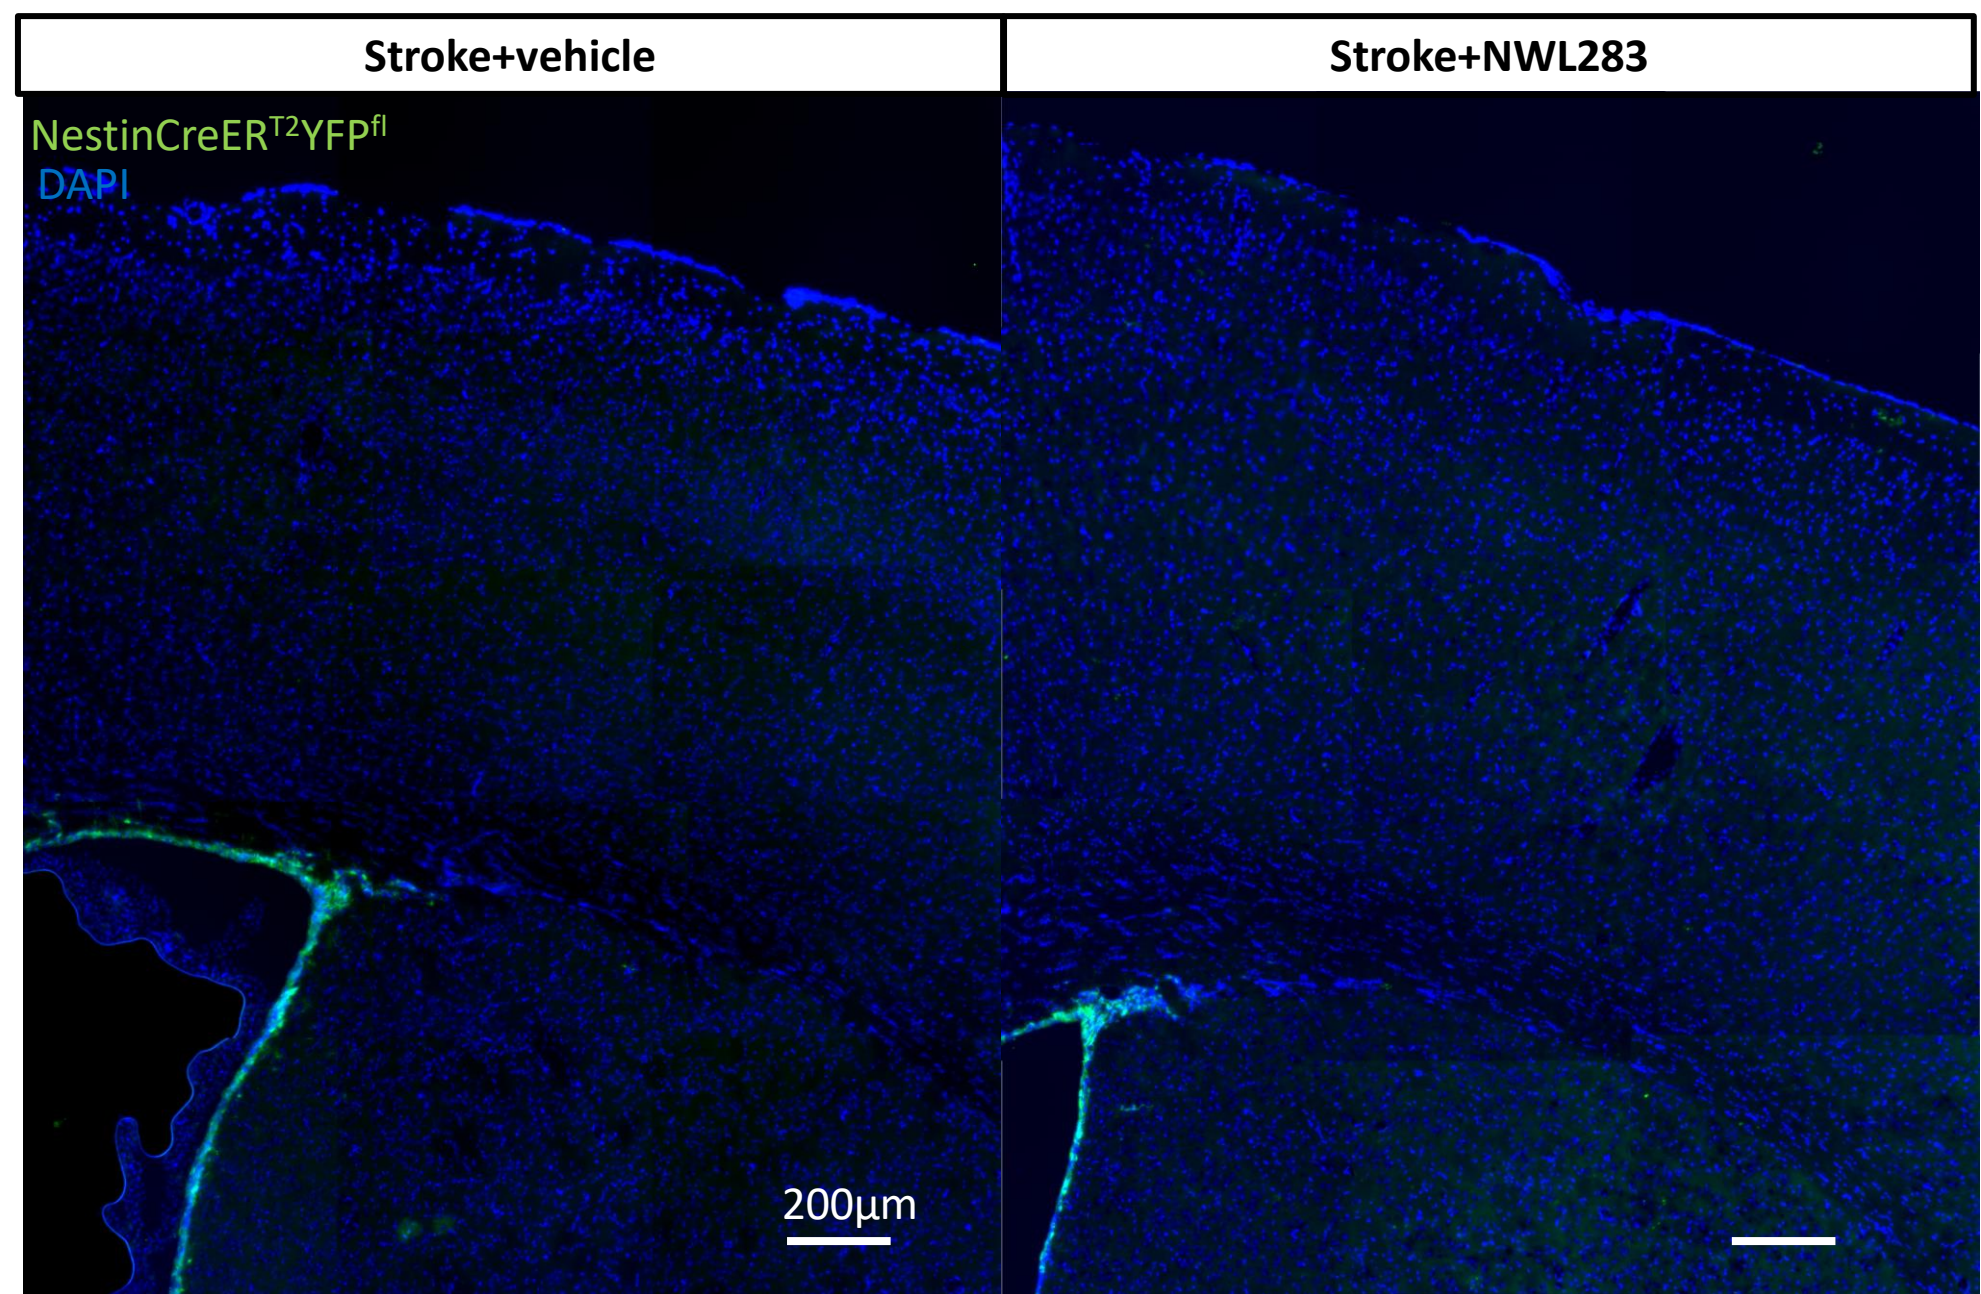

**Figure S4.** NPCs were pre-labelled prior to stroke, using a NestinCreER<sup>T2</sup>YFP<sup>fl</sup> reporter mouse line. There are no NestinYFP+ cells present in the contralateral hemisphere of stroke+vehicle and stroke+NWL283 mice.
